# Supplementary material for: Notch maintains Drosophila type II neuroblasts by suppressing the expression of the Fez transcription factor Earmuff
Source: Oxford University Press journal article supplement (doi:10.1242/dev.136184), 2016-01-01
Supplement: dev136184supp.pdf [file dev136184supp.pdf]

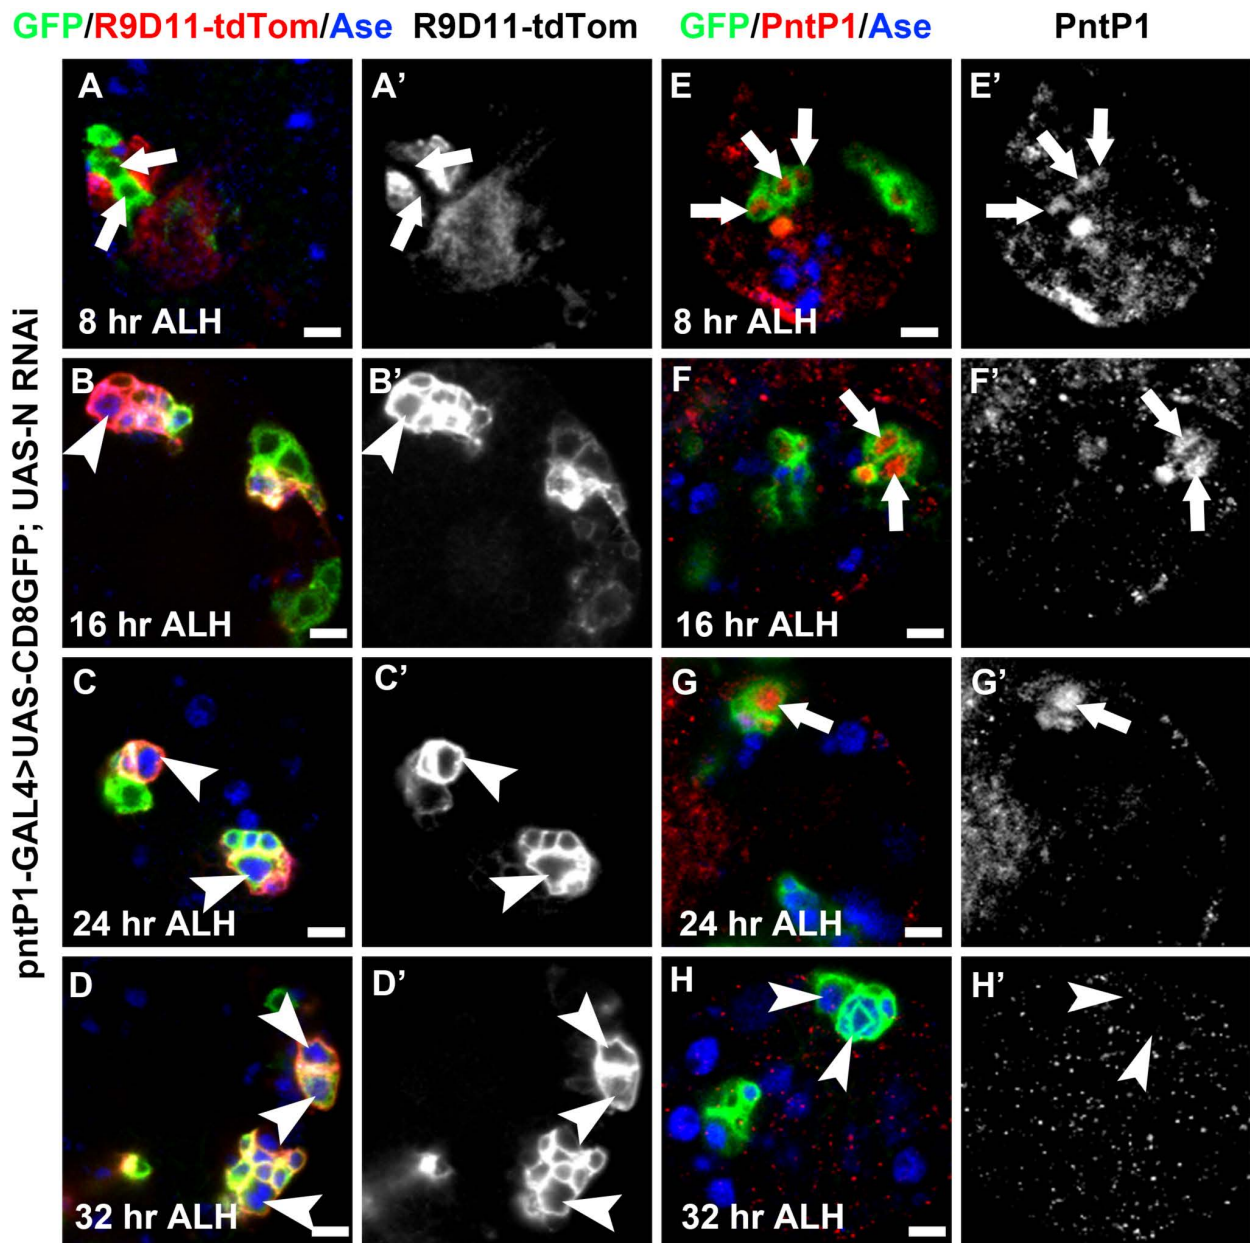

pntP1-GAL4>UAS-CD8GFP; UAS-N RNAi

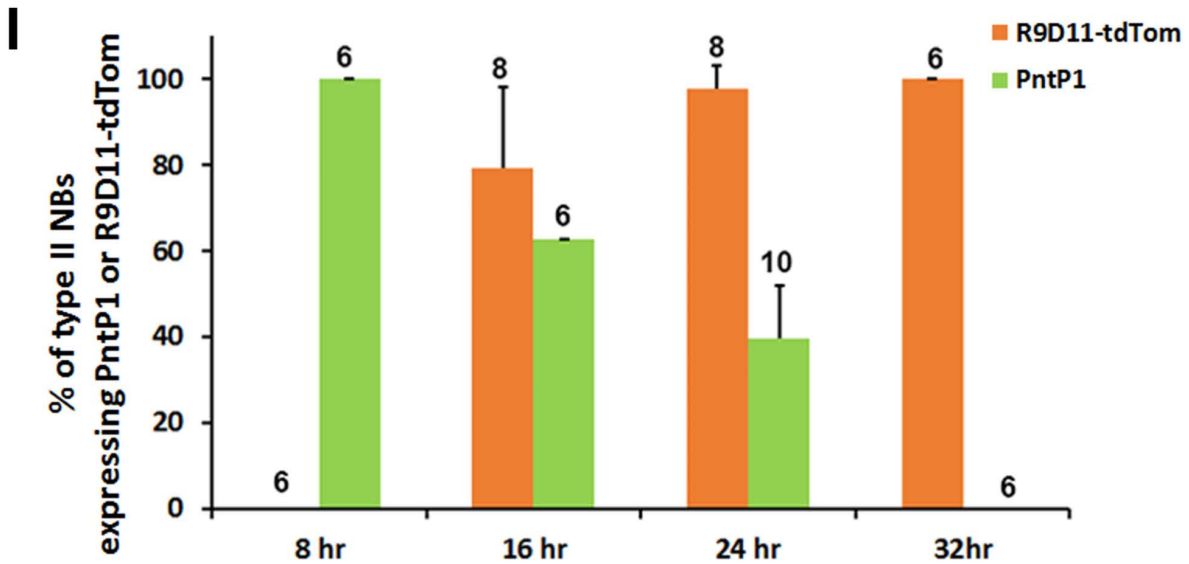

**Figure S1:** Dynamics of PntP1 and Erm expression in Notch knockdown type II NBs. Notch is knocked down by *pntP1-GAL4*, which also drives the expression of mCD8-GFP to label type II NB lineages. **(A-D)** R9D11-tdTom expression in Notch knockdown type II NBs at 8 – 32 hours ALH. Arrows: type II NBs without R9D11-tdTom expression; arrowheads: type II NBs with the ectopic R9D11-tdTom expression. **(E-H)** PntP1 expression in Notch knockdown type II NBs at 8 - 32 hours ALH. Arrows: type II NBs with PntP1 expression; arrowheads: type II NBs without PntP1 expression. **(I)** Quantifications of the percentage of Notch knockdown type II NBs with PntP1 or R9D11-tdTom expression. Numbers on top of each bar represent the number of brain lobes examined. Error bars represent STDEV. Scale bars: 10  $\mu$ m
